# Supplementary material for: An injectable vitreous substitute with sustained release of metformin for enhanced uveal melanoma immunotherapy
Source: Royal Society of Chemistry journal article supplement (doi:10.1039/d2bm01058e), 2022-01-01
Supplement: d2bm01058e1.pdf [file d2bm01058e1.pdf]

## Supporting Information

### Injectable Vitreous Substitute Sustained Release Metformin for Enhanced Uveal Melanoma Immunotherapy

*Muyue Yang<sup>‡</sup>, Jipeng Li<sup>‡</sup>, Zeyang Liu<sup>‡</sup>, Haiyang Zhang, Jin Liu, Yan Liu, Ai Zhuang, Huifang Zhou\*, Ping Gu\*, Xianqun Fan\**

Department of Ophthalmology, Shanghai Ninth People's Hospital, Shanghai Jiaotong University School of Medicine, Shanghai 200011, China. Shanghai Key Laboratory of Orbital Diseases and Ocular Oncology, Shanghai 200011, China.

Correspondence to:

Huifang Zhou<sup>a</sup>, Ping Gu<sup>b</sup>, Xianqun Fan<sup>c</sup>

<sup>a</sup>E-mail: fangzzfang@163.com

<sup>b</sup>E-mail: guping2009@126.com

<sup>c</sup>E-mail: fanxq@sjtu.edu.cn

<sup>‡</sup>These authors equally contributed to this work.

## 1. Supplementary figures

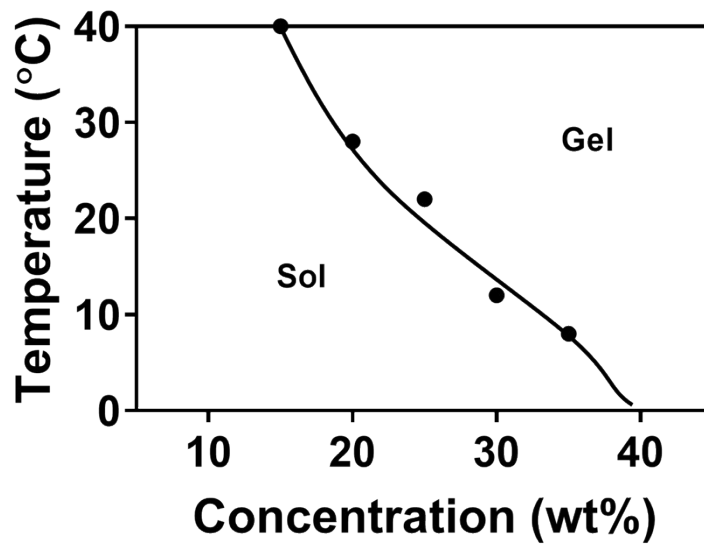

**Figure S1. The phase diagram of IVS.** IVS (20 wt%) underwent a thermo-sensitive sol-gel transition at approximately 27 °C.

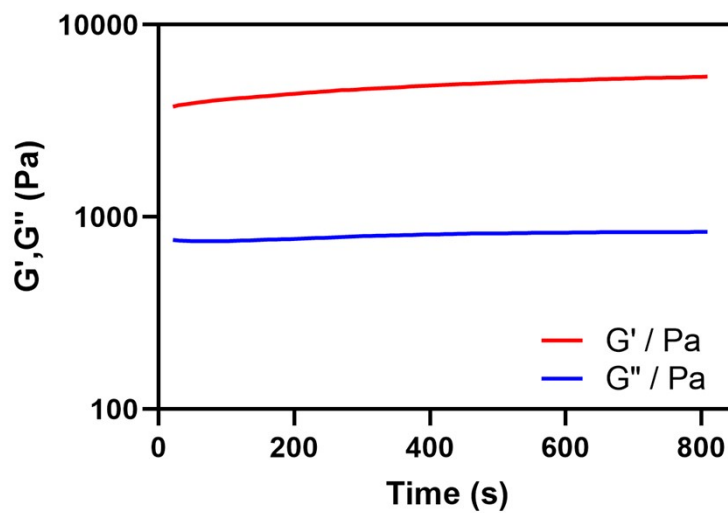

**Figure S2. Rheological test of IVS in a time sweep mode.** Variation of dynamic storage moduli  $G'$  and loss moduli  $G''$  of IVS in a time sweep mode at 37 °C.  $G'$  was higher than  $G''$ , suggesting a stable gel state of IVS at 37 °C.

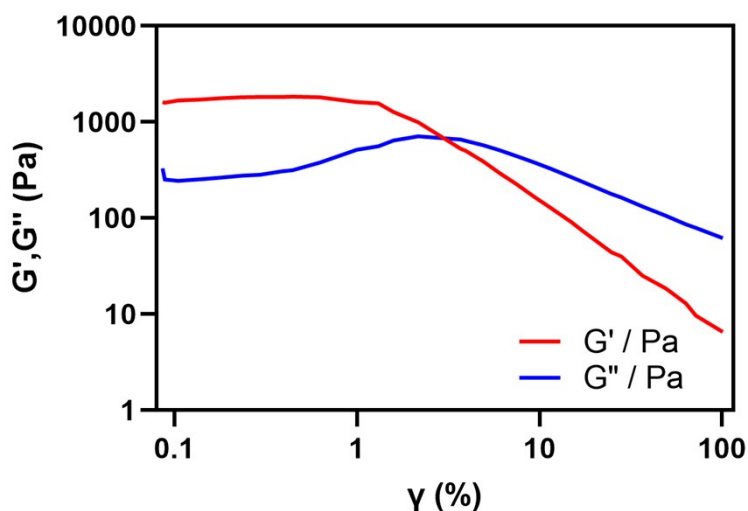

**Figure S3. Rheological test of IVS in an amplitude sweep mode.** Variation of dynamic storage moduli  $G'$  and loss moduli  $G''$  of IVS in an amplitude sweep mode at 37 °C.

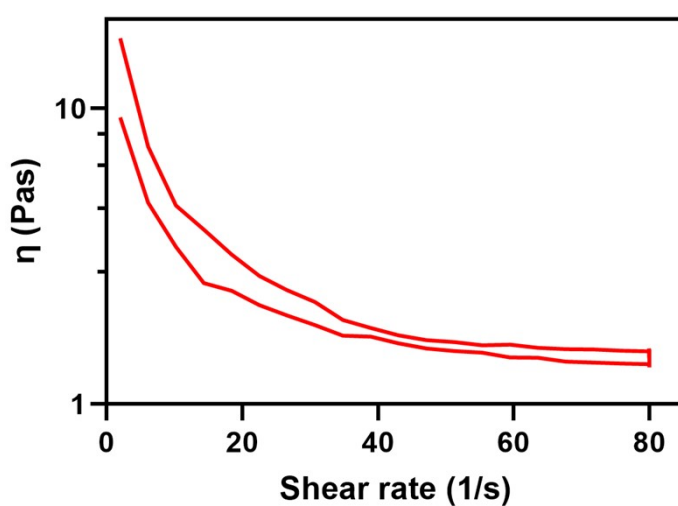

**Figure S4. The viscosity curve of IVS.** The viscosity of IVS rapidly decreased when the shear rate increased from 2 to 80  $\text{s}^{-1}$ , while gradually recovered when shear rate decreased, demonstrating the recovery ability of IVS.

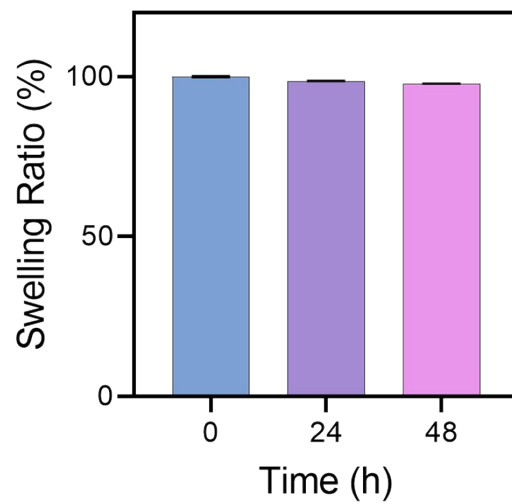

**Figure S5. The swelling ratio of IVS.** No significant swelling of IVS was observed up to 48 h, thus avoiding high intraocular pressure due to unexpected swelling of IVS after injection into eyeballs.

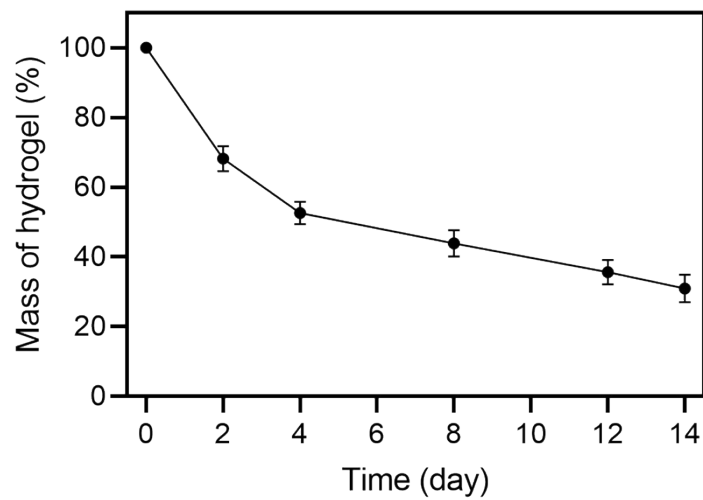

**Figure S6.** The *in vitro* degradation behavior of IVS (20 wt%) in PBS containing 20% FBS (n=3).

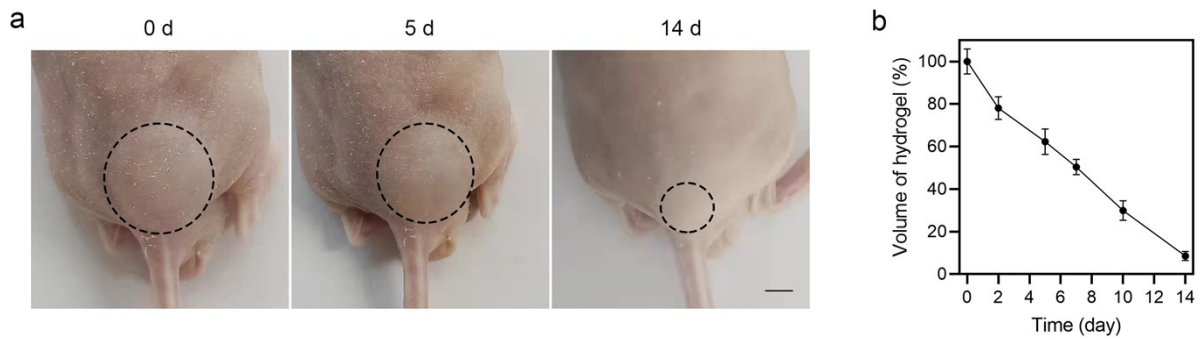

**Figure S7. *In vivo* degradation behavior of IVS.** a) The outline of IVS on 0, 5, and 14 d was indicated by the black dotted lines. IVS largely degraded by 14 days, avoiding secondary surgeries. Scale bar: 50 cm. b) Quantitative analysis of the volume of hydrogel (n = 3).

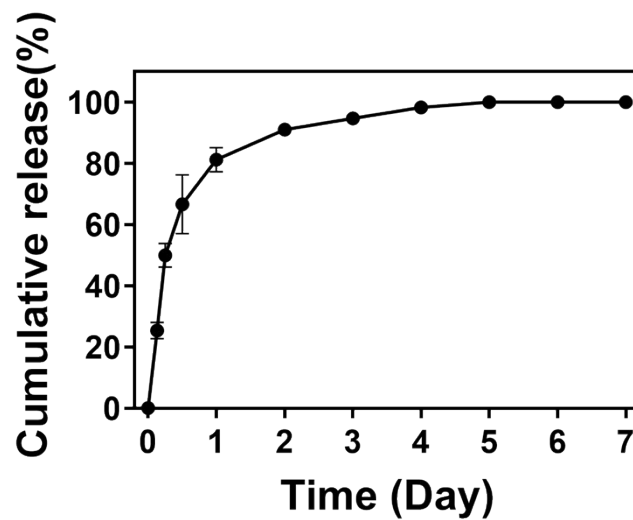

**Figure S8. Cumulative release of metformin from IVS-Met.** IVS-Met prolonged the release of metformin up to 5 days *in vitro*.

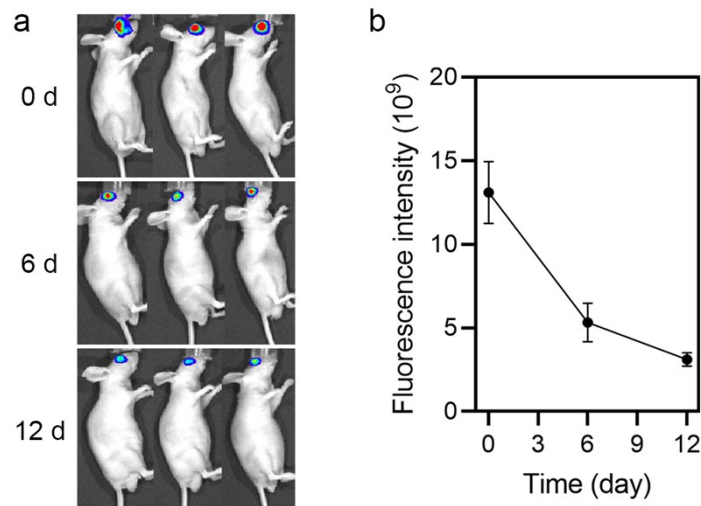

**Figure S9. The *in vivo* release kinetics of metformin.** a) IVS-Met was labeled by Cy5.5 and injected into eyeballs, and then monitored by the IVIS Lumina system at different time points. b) Quantitative analysis of the fluorescence intensity (n = 3).

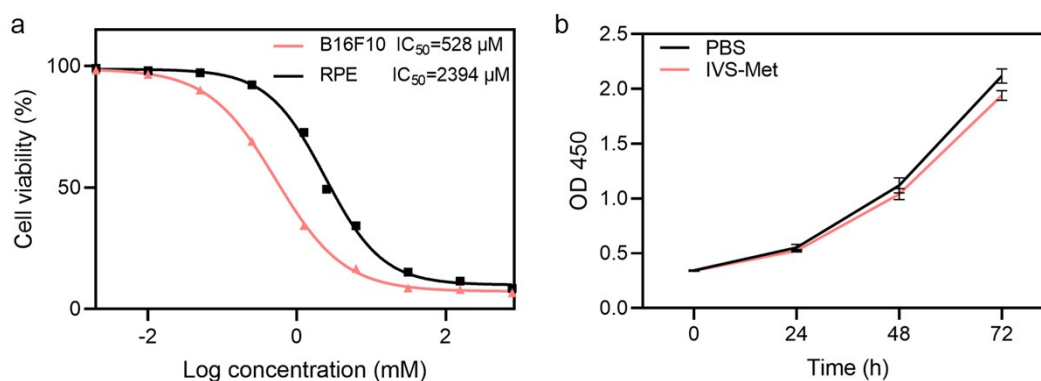

**Figure S10.** a) Cell viability of tumor cell (B16F10 cell) and normal cells (RPE cell) after treatment with various concentrations of metformin. The IC<sub>50</sub> values are listed after the cell names. b) Cell viability of RPE cell treated with 1 mM of metformin tested by CCK-8 assay. 1 mM of metformin did not show obvious inhibitory effect on the proliferation of normal cells. The absorbance at 450 nm was recorded and is presented as the mean ± SD (n = 3).

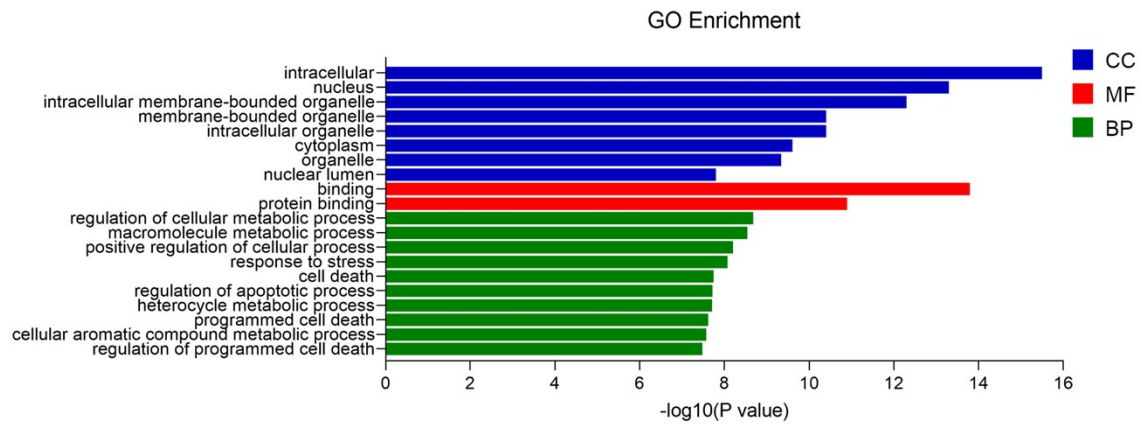

**Figure S11. The GO enrichment analysis of differentially expressed genes.** The GO analysis classified differentially expressed genes to cellular components (CC), biological process (BP) and molecular function (MF) according to the molecular function of genes. The result indicated that IVS-Met mainly affected the genes participating in the regulation of apoptotic process and cellular metabolic process.

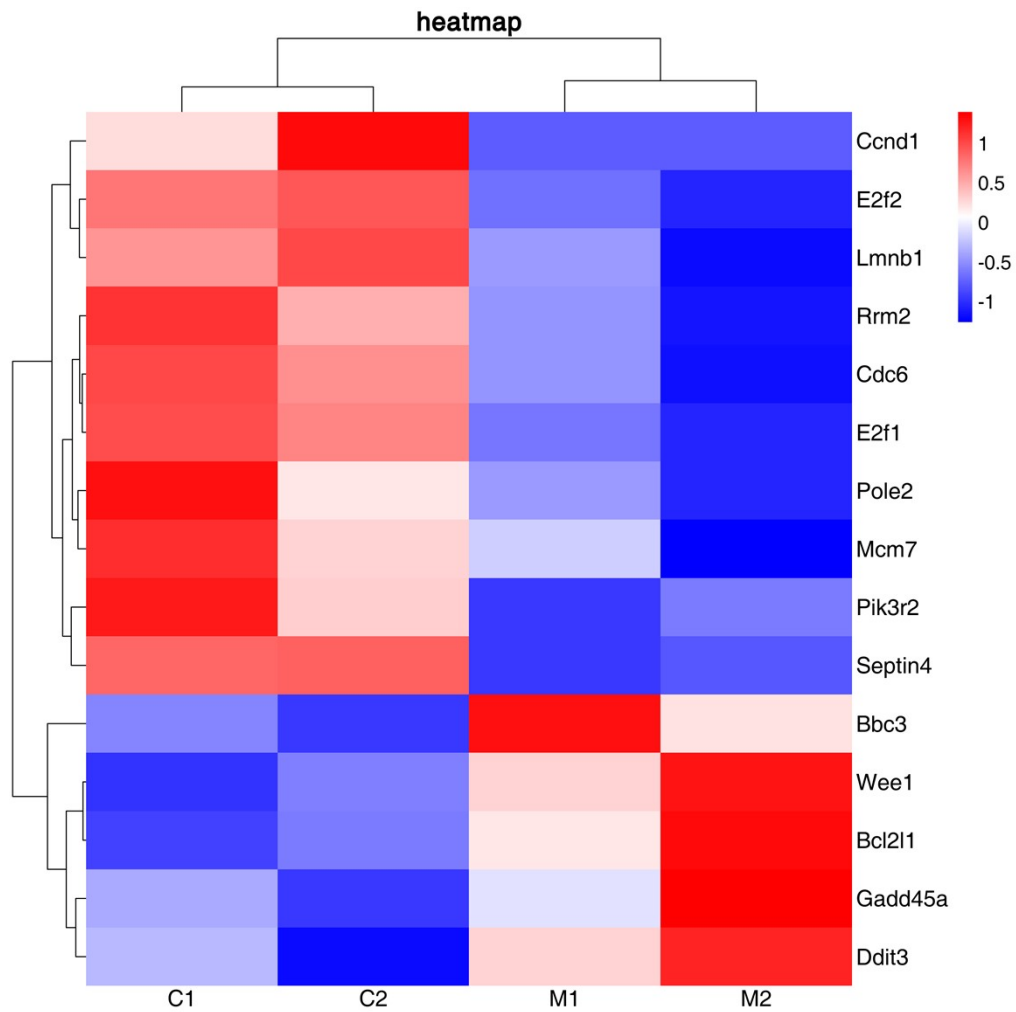

**Figure S12. The heatmap of differentially expressed genes associated with cell cycle and apoptosis.** Differentially expressed genes between B16F10 (C1-C2) and B16F10 treated with IVS-Met (M1-M2). Red corresponds to up-regulation; blue to down-expression. The result suggested that IVS-Met induced the cell cycle arrest and enhanced apoptotic process.



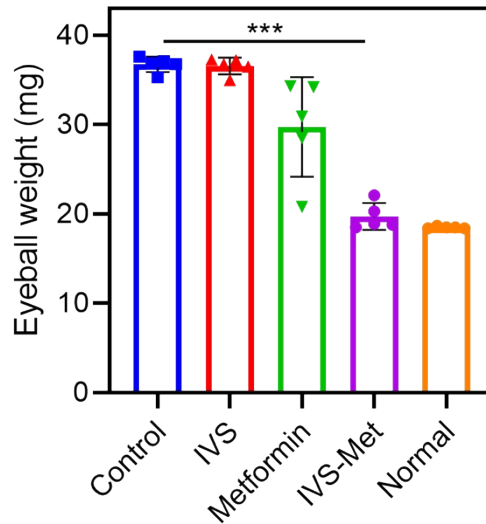

**Figure S13.** The weight of eyeballs in control, IVS, metformin and IVS-Met group. The eyeballs in each group were harvested from the orthotopic UM-bearing mice on 15 d and weighed ( $n = 5$ ). Data are presented as the mean  $\pm$  SD. Statistical analysis was performed using Student's  $t$ -test (\*\*\*)  $P < 0.001$ ).

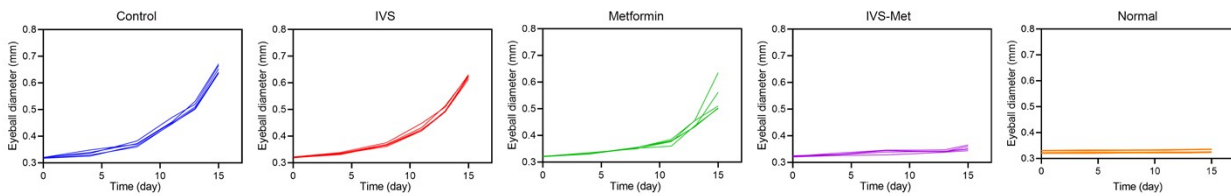

**Figure S14.** Growth curve of tumor in each group. The growth of tumor was recorded by eye diameter in each mouse from 0 d to 15 d ( $n = 5$ ).

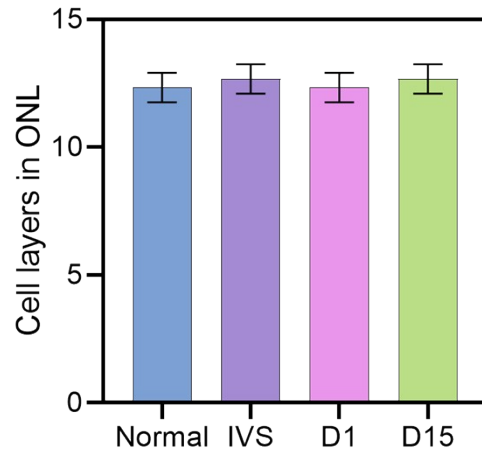

**Figure S15. Biocompatibility of the IVS-Met on retinal cells.** Quantitative analysis of the number of cell layers in the outer nuclear layer (ONL) in each group (n = 3). No significant difference was observed after IVS-Met treatment, demonstrating high biocompatibility of the IVS-Met on retinal cells.

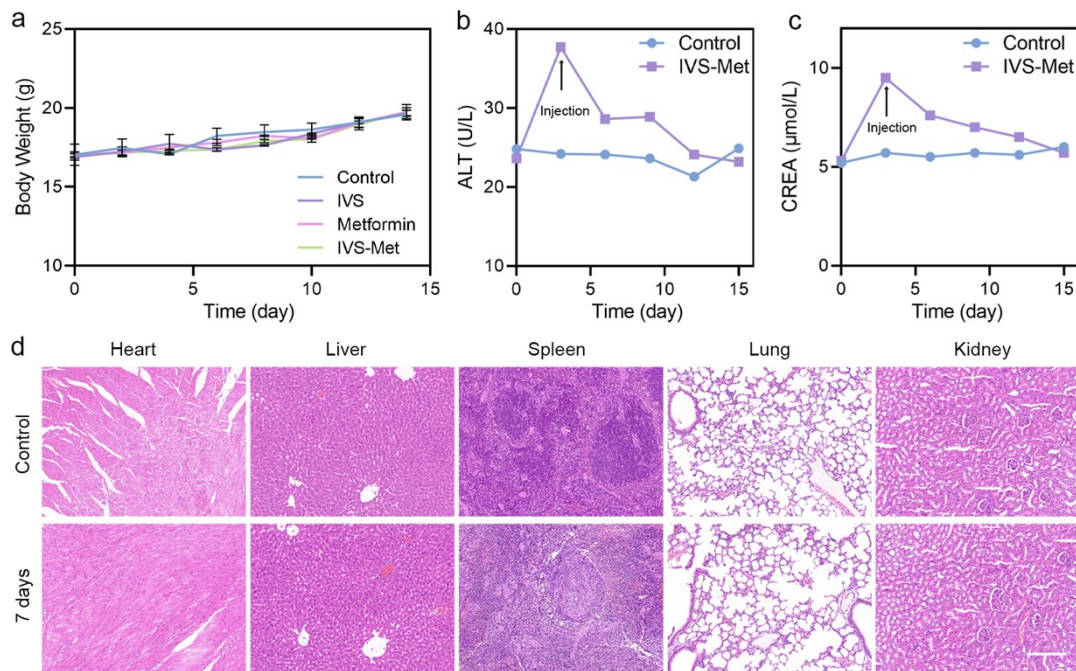

**Figure S16. Biocompatibility of IVS-Met.** a) The body weight of mice in each group. b) The serum levels of the hepatic function marker alanine aminotransferase (ALT). When IVS-Met was injected, the concentration of ALT increased, however, it returned to normal within

3 days. c) The serum levels of the renal function marker creatinine (CREA). After IVS-Met was injected, the concentration of CREA increased, but returned to normal in 3 days. d) The HE images of major organs (heart, liver, spleen, lung, and kidney) from control and IVS-Met-treated mice. No signs of inflammation, cell necrosis, or apoptosis were observed in the tissues of mice treated with IVS-Met. Scale bar: 100  $\mu$ m.

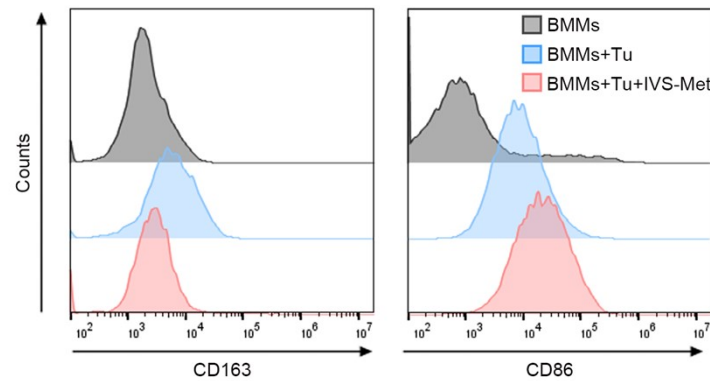

**Figure S17. TAM polarization evaluated by histograms of the cell surface expression of CD163 and CD86 in each group.** After co-incubated with tumor cells (BMMs+Tu), the expression of M2-associated CD163 in BMMs increased. After treated with tumor cells and IVS-Met (BMMs+Tu+IVS-Met), the expression of CD163 decreased, while the expression of M1-associated CD86 increased, revealing that IVS-Met reduced the proportion of M2 TAMs and induced M1 TAMs in TME.

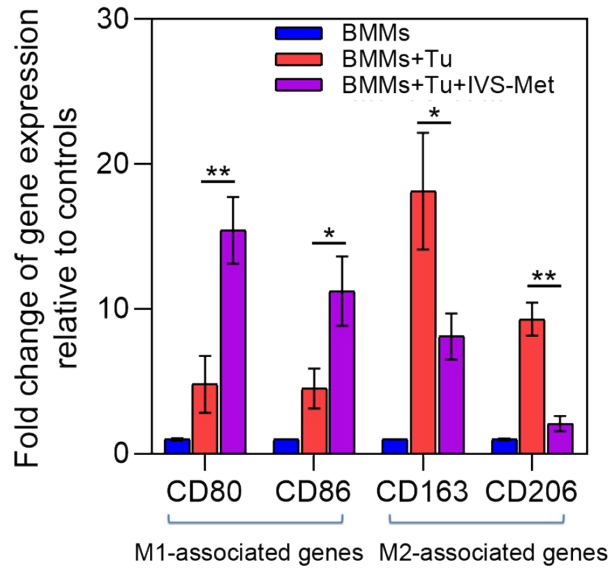

**Figure S18.** RT-qPCR analysis of the levels of expression of M1-associated (CD80 and CD86) or M2-associated (CD163 and CD206) genes. Data are presented as the mean  $\pm$  SD (n = 3). Statistical analysis was performed using Student's *t*-test (\*  $P < 0.05$ , \*\*  $P < 0.01$ ).

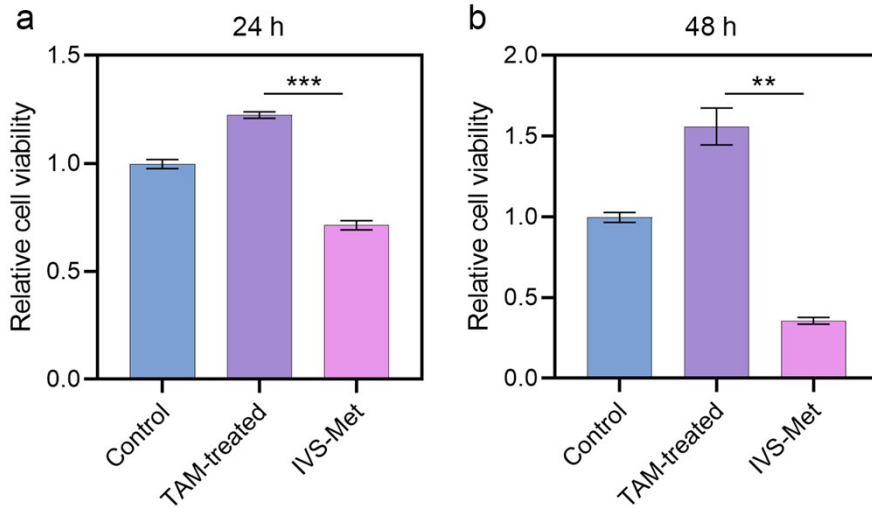

**Figure S19.** The proliferative ability of tumor cells after various treatment. The cell viability of B16F10 cells in control (without treatment), TAM-treated (co-incubated with TAMs), and IVS-Met (treated with TAMs and IVS-Met) group at 24 h (a) and 48 h (b). The statistical significance was measured by Student's *t*-test (\*\*  $P < 0.01$ , \*\*\*  $P < 0.001$ ). Tumor

cells exhibited enhanced proliferative ability when co-incubated with TAMs. However, the viability of tumor cells was significantly inhibited after treatment with IVS-Met.

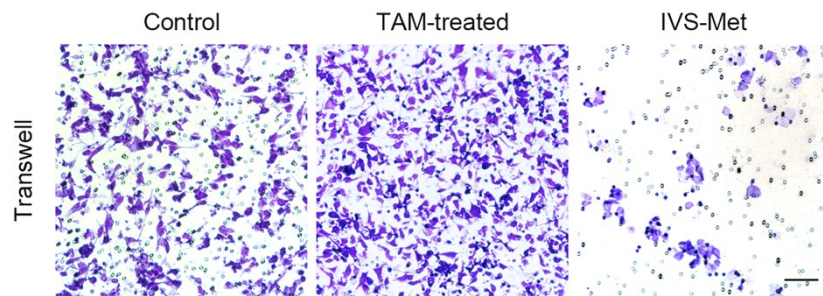

**Figure S20. The invasive ability of tumor cells after various treatment.** The transwell assay of B16F10 cells in control (without treatment), TAM-treated (co-incubated with TAMs), and IVS-Met (treated with TAMs and IVS-Met) group at 48 h. Scale bar: 50  $\mu$ m. Tumor cells exhibited enhanced invasive ability when co-incubated with TAMs. However, the invasion of tumor cells was significantly inhibited after treatment with IVS-Met.

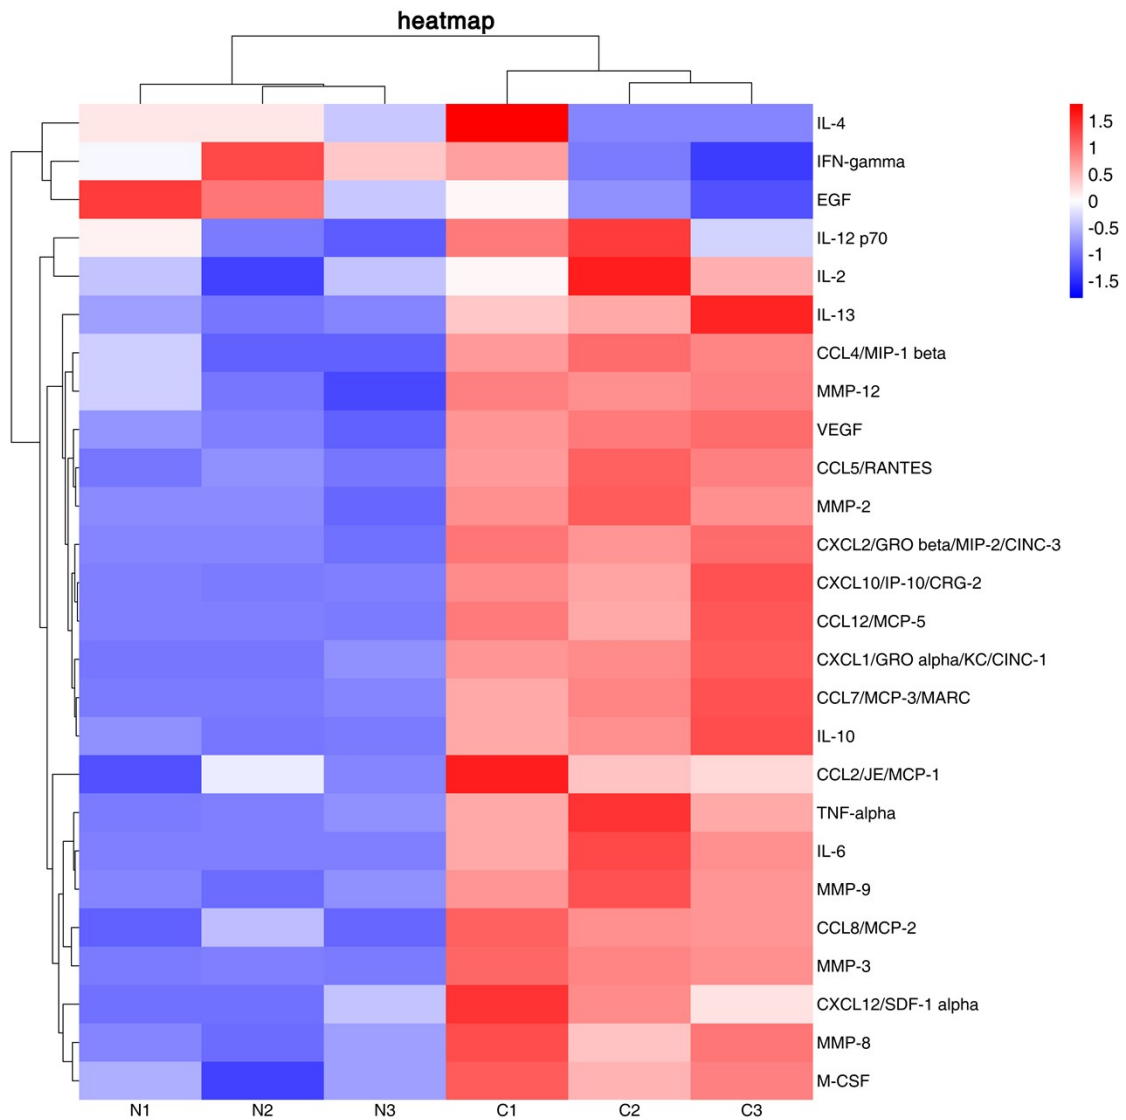

**Figure S21. Heatmap of the expression of inflammation-associated cytokines.** Differentially expressed cytokines between BMMs (N1-N3) and BMMs+Tu (C1-C3) group. Red corresponds to up-regulation; blue to down-expression. The expression of CCL2, CCL5, MMP8, MMP9, and MMP12 of BMMs after co-incubation with tumor cells increased compared with BMMs alone.

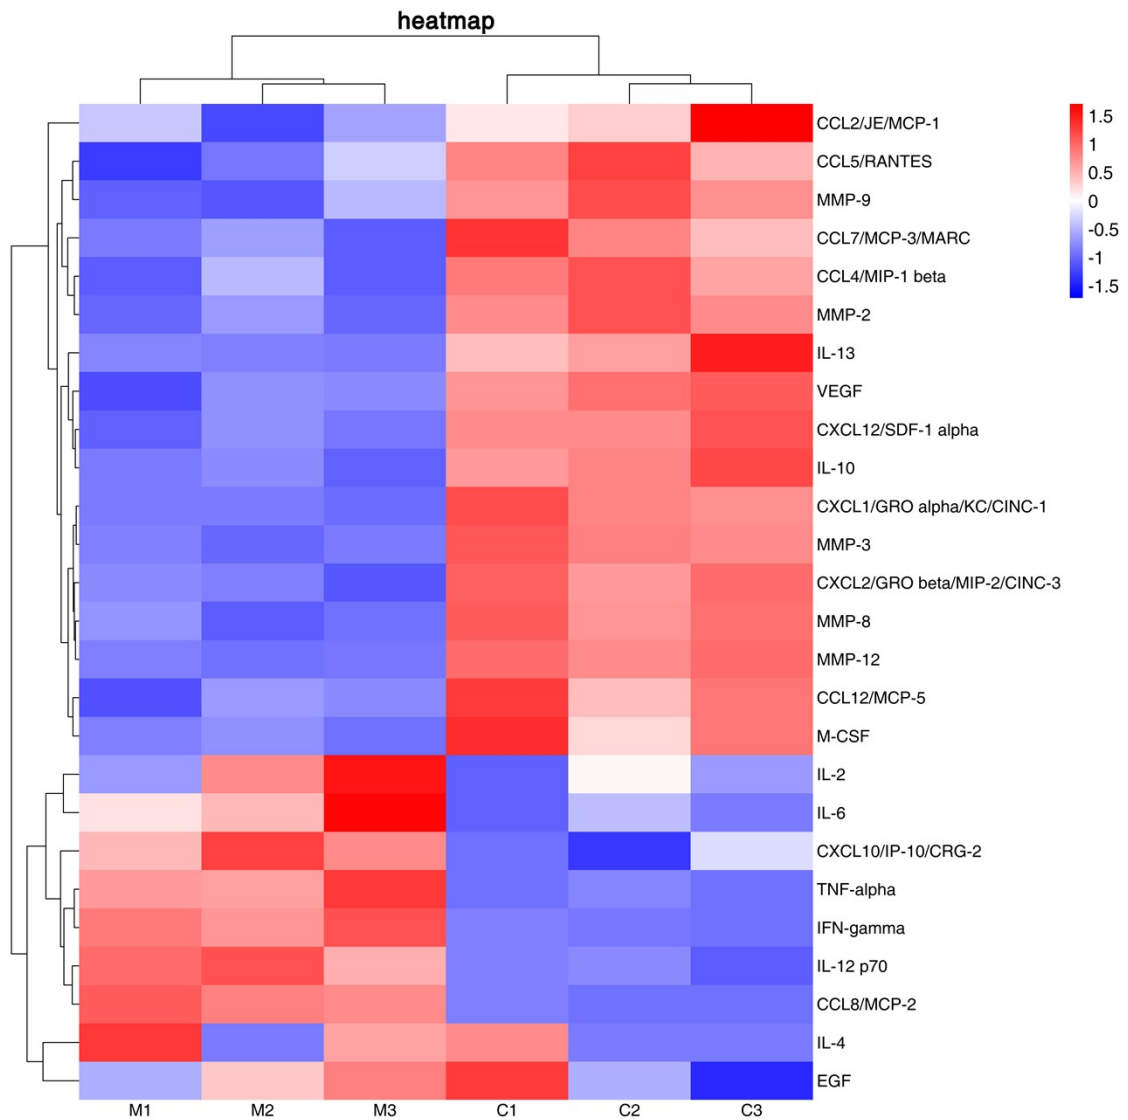

**Figure S22. Heatmap of the expression of inflammation-associated cytokines.** Differentially expressed cytokines between BMMs+Tu (C1-C3) and BMMs+Tu+IVS-Met (M1-M3) group. Red corresponds to up-regulation; blue to down-expression. The expression of CCL2, CCL5, MMP8, MMP9, and MMP12 decreased after IVS-Met treatment.

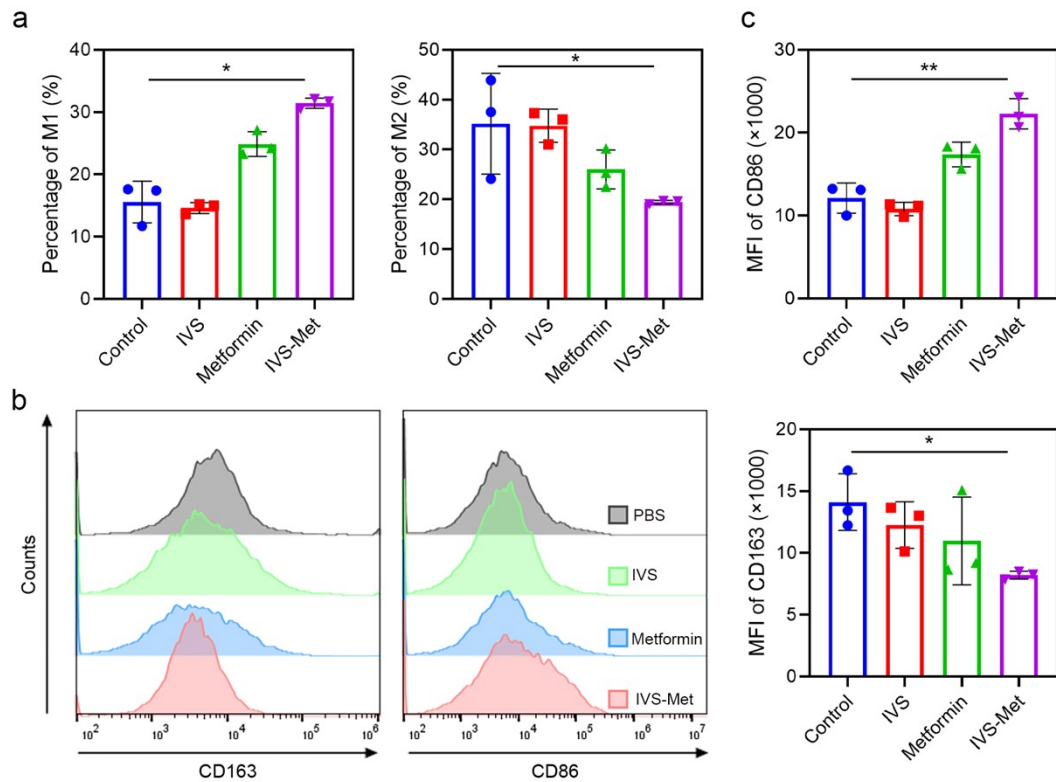

**Figure S23. TAM polarization effect of IVS-Met *in vivo*.** a) Quantitative analysis of the amount of M1 and M2 TAMs from flow cytometry results (n = 3). b) Representative histograms of the expression of cell surface marker CD163 and CD86 in each group. After treated with IVS-Met, the expression of CD163 reduced. c) Quantitative analysis of CD163 and CD86 (MFI) from flow cytometry (n = 3). The statistical significance was measured by Student's *t*-test (\*  $P < 0.05$ , \*\*  $P < 0.01$ ). These results revealed that IVS-Met could reduce the proportion of M2 TAMs and induce M1 TAMs in TME.



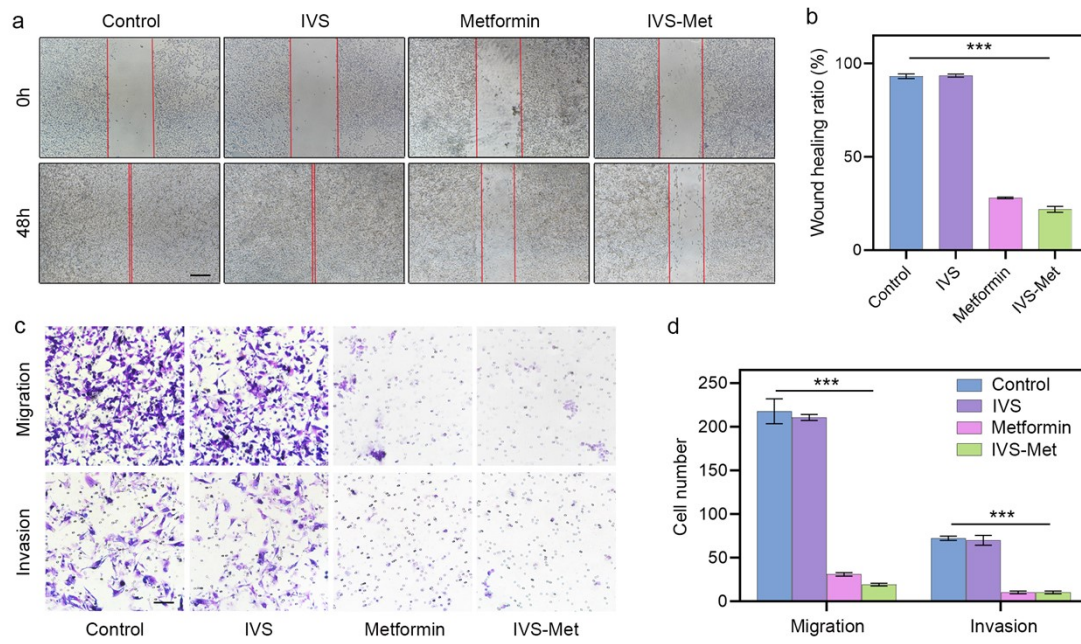

**Figure S24. The *in vitro* evaluation of the migration and invasion ability of tumor cells.** a) Wound-healing assay in each group. Scale bar: 100  $\mu\text{m}$ . b) Quantitative analysis of the wound healing ratio. c) Transwell migration and invasion assays. Scale bar: 50  $\mu\text{m}$ . d) Quantitative analysis of the migration and invasion ratio in each group. The statistical significance was measured by Student's *t*-test (\*\*\*)  $P < 0.001$ ). The inhibition rates of IVS-Met on the migration and invasion of tumor cells were 91.1% and 85.7%, respectively.

## 2. Supplementary tables

**Table S1.** Sequences of primers utilized in this paper

| Name    | Primer sequence (5'-3') |
|---------|-------------------------|
| Tnf-F   | TAGCCCACGTCGTAGCAAAC    |
| Tnf-R   | GCAGCCTTGTCCCTTGAAGA    |
| Nos2-F  | GGTGAAGGGACTGAGCTGTT    |
| Nos2-R  | ACGTTCTCCGTTCTCTTGCAG   |
| Arg1-F  | TTCTCAAAGGACAGCCTCG     |
| Arg1-R  | CAGACCGTGGGTCTTCACA     |
| Mrc1-F  | TTCAGCTATTGGACGCGAGG    |
| Mrc1-R  | GAATCTGACACCCAGCGGAA    |
| Il6-F   | CTCATTCTGCTCTGGAGCCC    |
| Il6-R   | CAACTGGATGGAAGTCTCTTGC  |
| Il10-F  | GTAGAAGTGATGCCCCAGGC    |
| Il10-R  | CACCTTGGTCTTGGAGCTTATT  |
| Gapdh-F | GATAAGCAGGGCGGGAGG      |
| Gapdh-R | CCCAATACGGCCAAATCCGT    |

**Table S2.** Killing rate of tumor cells in each group

| Treatment | Killing rate (%) |       |       |
|-----------|------------------|-------|-------|
|           | 24 h             | 48 h  | 72 h  |
| IVS       | 13.73            | 2.02  | 1.31  |
| Metformin | 30.35            | 48.99 | 12.01 |
| IVS-Met   | 32.23            | 70.46 | 72.83 |

**Table S3.** Percentages of M1 and M2 TAMs in each group

| Group | Percentage of M1 (%) | Percentage of M2 (%) | M1/M2 |
|-------|----------------------|----------------------|-------|
|-------|----------------------|----------------------|-------|

|           |          |          |          |
|-----------|----------|----------|----------|
| Control   | 15.56667 | 35.16667 | 0.442654 |
| IVS       | 14.6     | 34.76667 | 0.419942 |
| Metformin | 24.86667 | 26       | 0.95641  |
| IVS-Met   | 31.43333 | 19.43333 | 1.617496 |

---

**Table S4.** The median survival time in each group

| Group     | Median survival time (d) |
|-----------|--------------------------|
| Control   | 20                       |
| IVS       | 22                       |
| Metformin | 27                       |
| IVS-Met   | >43                      |

---
